# Supplementary material for: Lysine Demethylase 5A Is Required for MYC-Driven Transcription in Multiple Myeloma
Source: Oxford University Press journal article supplement (doi:10.1158/2643-3230.bcd-20-0108), 2021-04-10
Supplement: 26433230bcd200108-sup-245460_2_supp_7002903_qqdvzv.docx [file 26433230bcd200108-sup-245460_2_supp_7002903_qqdvzv.docx]

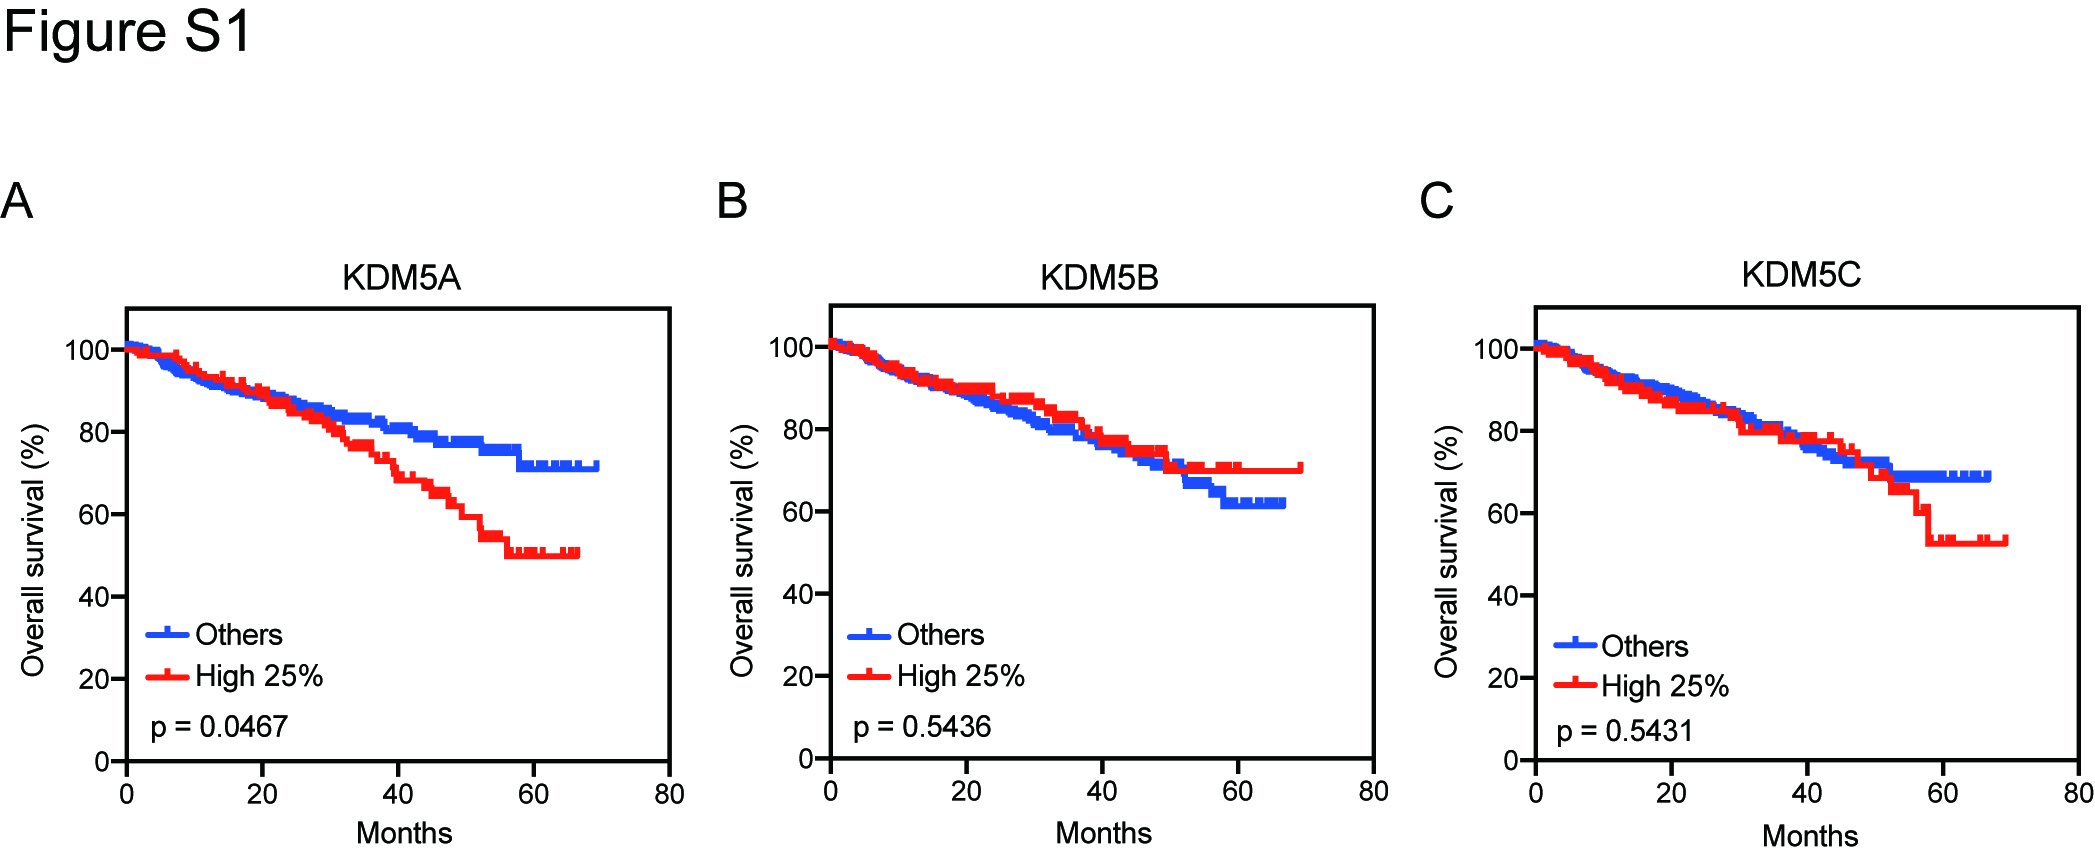


**Supplementary Figure S1. Higher KDM5A expression is associated with poor prognosis in MM**

**A-C,** Kaplan-Meier curves comparing overall survival of newly diagnosed MM patients based on *KDM5A* (p=0.0467) (A), *KDM5B* (p=0.5436) (B), *KDM5C* (p=0.5431) (C) expression (GSE2658, n = 559). Data was analyzed by the log-rank test.
