# Supplementary material for: Lysine Demethylase 5A Is Required for MYC-Driven Transcription in Multiple Myeloma
Source: Oxford University Press journal article supplement (doi:10.1158/2643-3230.bcd-20-0108), 2021-04-10
Supplement: 26433230bcd200108-sup-245460_2_supp_7002905_qqdfzf.docx [file 26433230bcd200108-sup-245460_2_supp_7002905_qqdfzf.docx]

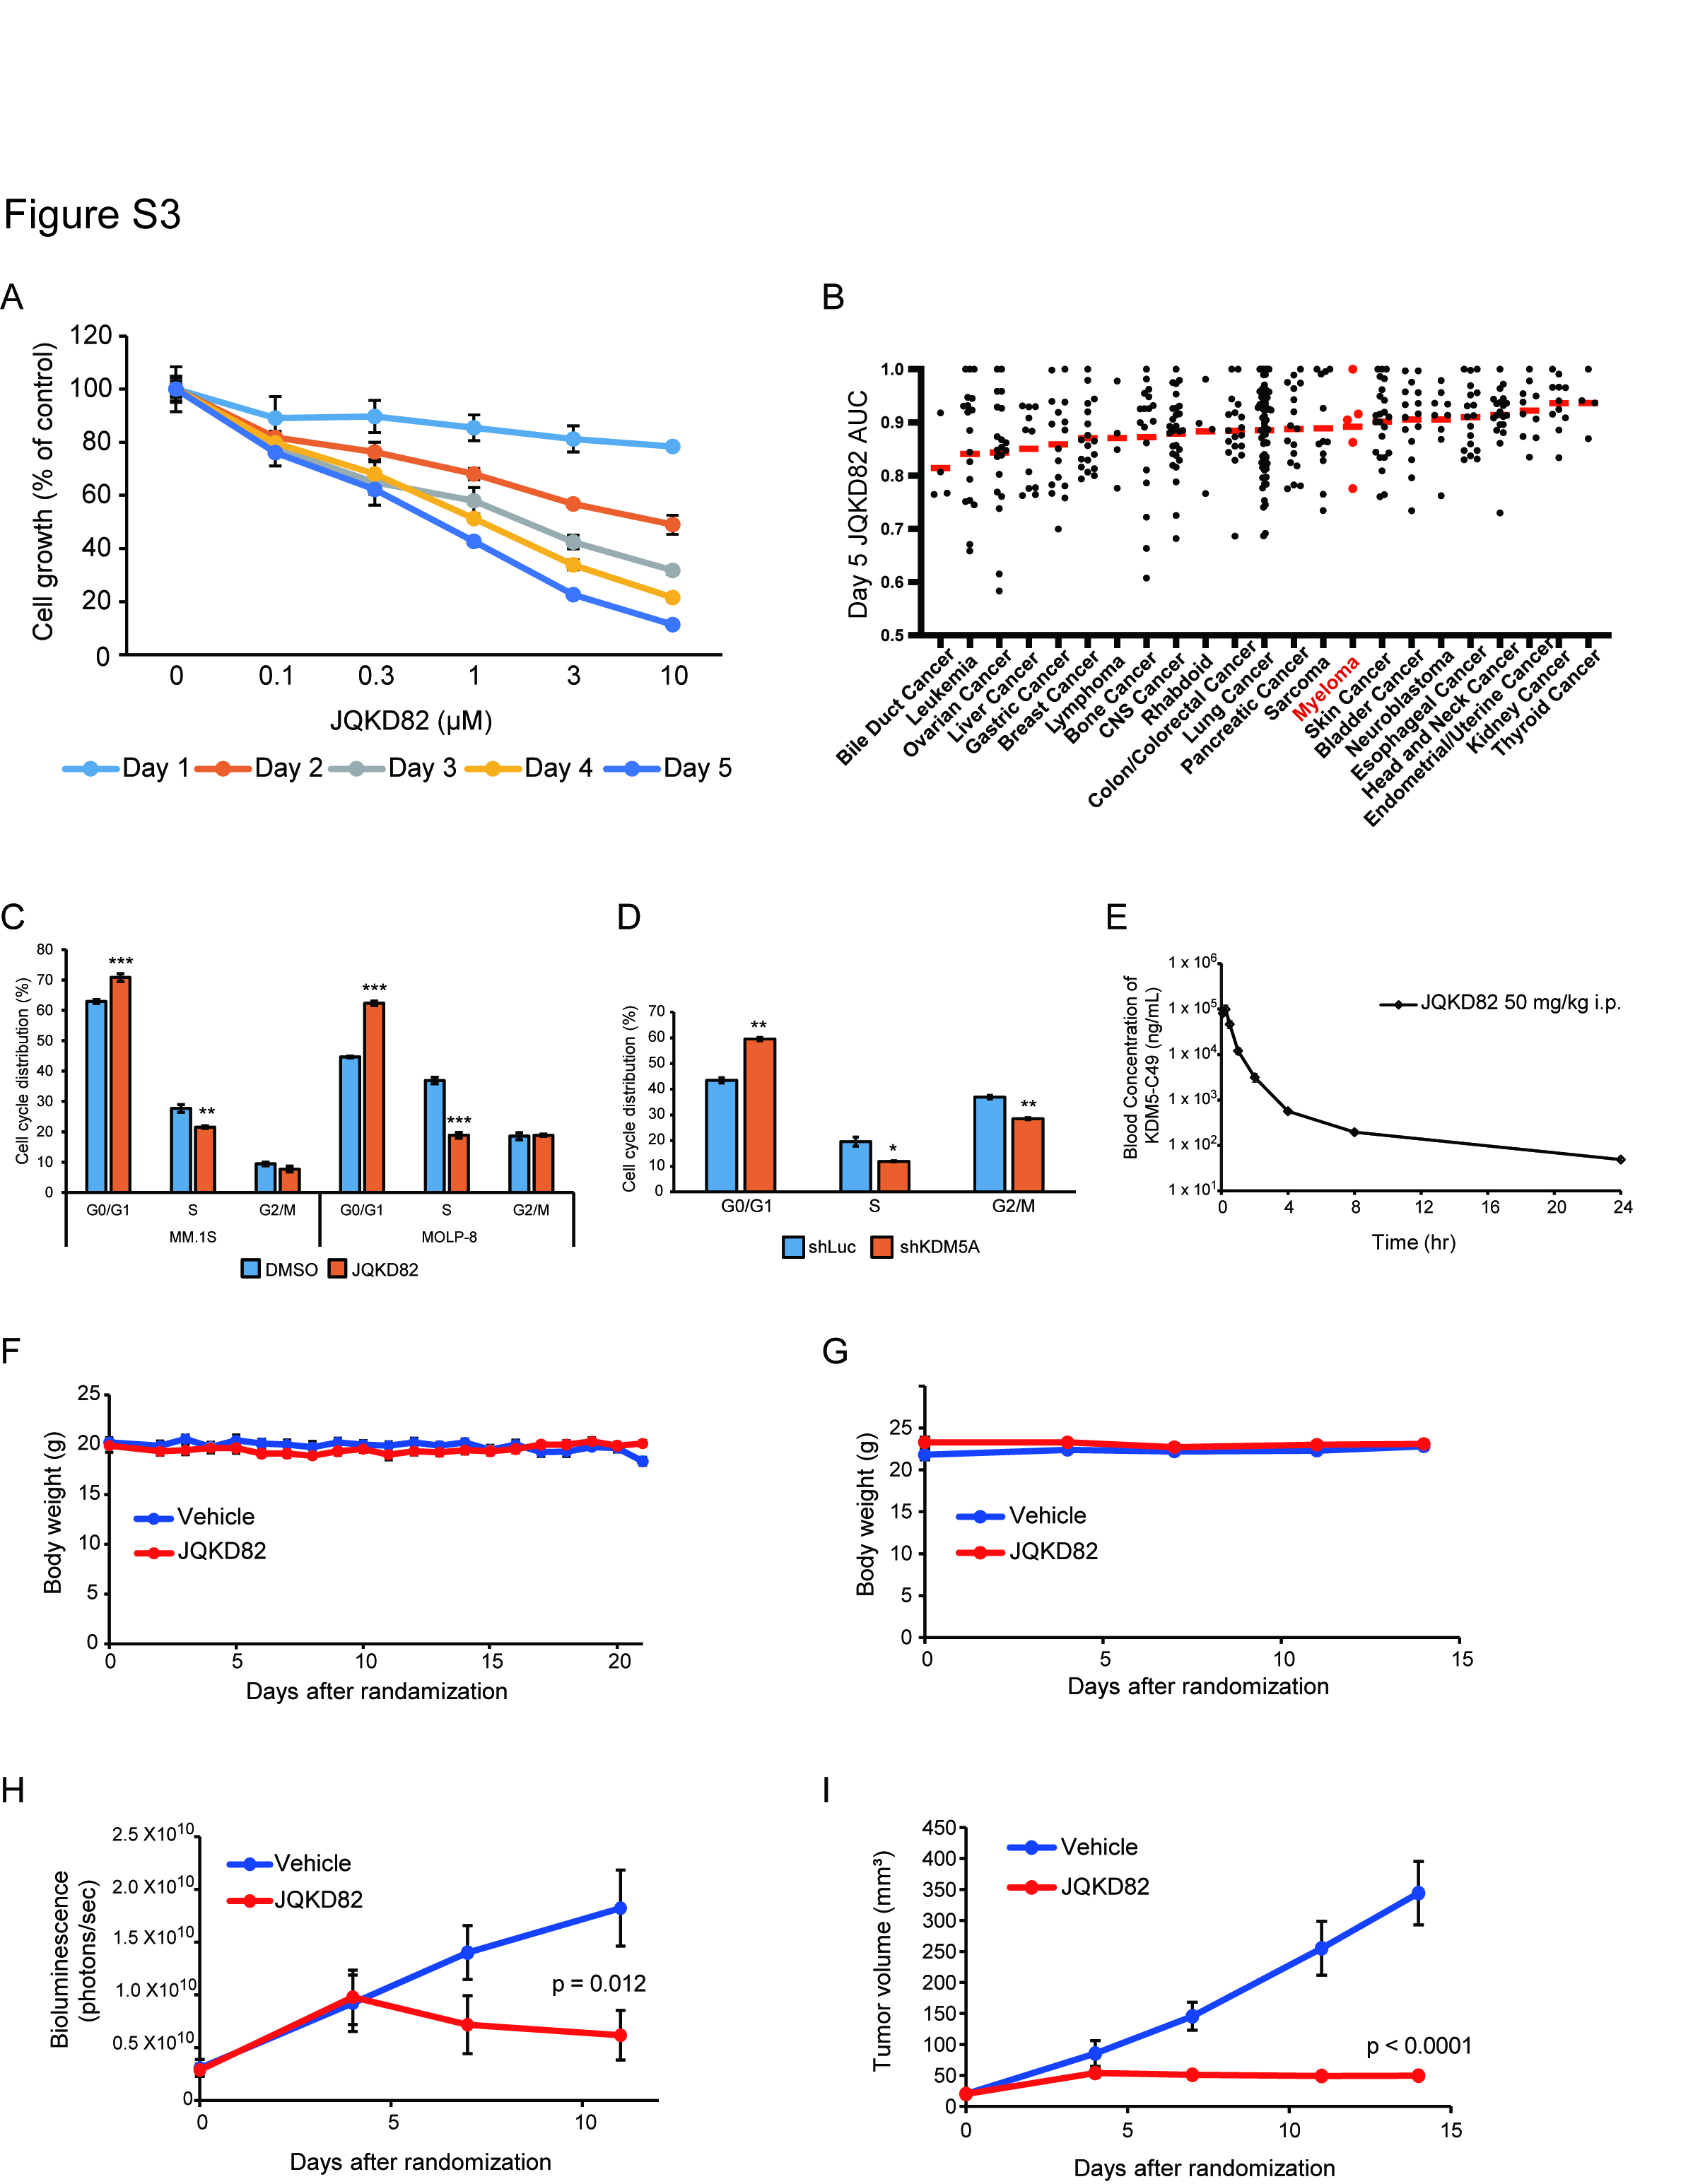


**Supplementary Figure S3. JQKD82 inhibits MM cell growth**

**A,** MM.1S cells were cultured with the indicated concentrations of JQKD82 for 1-5 days. Viable cells were determined by MTT assay, and the cell growth relative to untreated control cells are shown. Data represent mean ± s.d. of triplicate cultures.

**B,** Growth response by PRISM assay of 367 distinct barcoded tumor cell lines in response to a dilution series of JQKD82. n=3 independent measurements for each dose. Assay was performed at day 5 of treatment. Individual dots represent distinct tumor cell lines, stratified by tumor lineage. Bar represents median of area under the curve (AUC) measurement for all treated cell lines in a lineage. Measurements represent the mean of duplicate AUC measurements.

**C,** MM.1S and MOLP-8 cells were incubated with 1 µM of JQKD82 for 96 h prior to analysis of cell cycle profiles by propidium iodide-flow cytometry.

**D,** MOLP-8 cells were transduced with shKDM5A or shLuc, and were harvested after 4 days. Cells were fixed, stained with propidium iodide, and analyzed for cell cycle distribution using flow cytometry (**C** and **D**). Data represent mean ± s.d. of triplicate (**C**) or duplicate (**D**) samples. **P* < 0.05, ***P* < 0.01, ****P* < 0.01 compared with control; unpaired Student’s t-test.

**E,** Pharmacokinetics study of JQKD82. Three CD1 mice were intraperitoneally injected with JQKD82 at 50mg/kg, and blood samples were collected at 0, 0.083, 0.25, 0.5, 1, 2, 4, 8 and 24 h. Shown is blood concentration of KDM5-C49 (active metabolite of JQKD82) measured by quantitative LC/MS/MS at each time point. Data represent mean ± s.d.

**F,** Body weight of the disseminated MM model mice treated intraperitoneally with JQKD82 at 50 mg/kg or vehicle twice a day for 3 weeks is shown. Data represent mean ± s.e.m. n = 9 per group.

**G,** Body weight of the plasmacytoma model mice treated intraperitoneally with JQKD82 at 75 mg/kg or vehicle twice a day for 2 weeks is shown. Data represent mean ± s.e.m. n = 10 per group.

**H-I,** MOLP-8 TurboGFP-Luc cells were subcutaneously injected into NSG mice. After tumor engraftment, the mice were randomized to JQKD82 or vehicle groups, and treated with JQKD82 at 75 mg/kg or vehicle, respectively, by intraperitoneal injection twice a day. Tumor growth was serially evaluated by bioluminescent imaging (BLI) (**H**) or tumor measurement by calipers (**I**). n = 10 mice per group. Data represent mean ± s.e.m. p=0.012 (H), p<0.0001 (I) comparing treatment group against control group by unpaired Student’s t-test.
