# Supplementary material for: Lysine Demethylase 5A Is Required for MYC-Driven Transcription in Multiple Myeloma
Source: Oxford University Press journal article supplement (doi:10.1158/2643-3230.bcd-20-0108), 2021-04-10
Supplement: 26433230bcd200108-sup-245460_2_supp_7002914_qqd2zf.xlsx [file 26433230bcd200108-sup-245460_2_supp_7002914_qqd2zf.xlsx]

## Sheet: Sheet1
		Supplementary Table S2. ChIP-seq data whose peaks are significantly overlapped with KDM5A ChIP-seq peaks in MM.1S cells
		ID	Antigen	Number of peaks	Overlaps/KDM5A peaks	Overlaps/control	Log P-value	Log Q-value	Fold enrichment
		SRX264464	CDK7	2283	1728/29516	13/29516	-324	-324	132.92
		SRX129093	MAX	2289	1583/29516	12/29516	-324	-324	131.92
		SRX366793	BRD3	3296	2899/29516	23/29516	-324	-324	126.04
		SRX327757	MED1	7018	5551/29516	45/29516	-324	-324	123.36
		SRX327759	CDK9	6904	5614/29516	46/29516	-324	-324	122.04
		SRX327758	CDK9	8692	7390/29516	63/29516	-324	-324	117.3
		SRX366795	BRD3	3158	2684/29516	23/29516	-324	-324	116.7
		SRX366792	BRD3	8309	6282/29516	54/29516	-324	-324	116.33
		SRX219375	RNA polymerase II	11241	9084/29516	79/29516	-324	-324	114.99
		SRX244177	CDK9	8609	6993/29516	61/29516	-324	-324	114.64
		SRX447602	RNA polymerase II	11858	9309/29516	82/29516	-324	-324	113.52
		SRX366794	BRD3	3312	2831/29516	25/29516	-324	-324	113.24
		SRX204907	RNA polymerase II	14144	10745/29516	100/29516	-324	-324	107.45
		SRX447603	CDK9	2567	2030/29516	19/29516	-324	-324	106.84
		SRX327763	RNA polymerase II	12026	9505/29516	89/29516	-324	-324	106.8
		SRX219377	RNA polymerase II	12329	9088/29516	86/29516	-324	-324	105.67
		SRX2140216	CCND2	2797	2125/29516	21/29516	-324	-324	101.19
		SRX264462	CDK7	4185	3023/29516	30/29516	-324	-324	100.77
		SRX204901	BRD4	4238	2616/29516	26/29516	-324	-324	100.61
		SRX129094	RNA polymerase II	9382	7435/29516	74/29516	-324	-324	100.47
		SRX244180	CDK9	14305	10127/29516	105/29516	-324	-324	96.45
		SRX204904	BRD4	2757	1819/29516	19/29516	-324	-324	95.74
		SRX204908	RNA polymerase II	16641	12174/29516	128/29516	-324	-324	95.11
		SRX327762	RNA polymerase II	17629	12904/29516	136/29516	-324	-324	94.88
		SRX244178	MED1	13871	10197/29516	108/29516	-324	-324	94.42
		SRX327764	RNA polymerase II	19065	13844/29516	149/29516	-324	-324	92.91
		SRX129116	MYC	18888	12651/29516	137/29516	-324	-324	92.34
		SRX204906	MED1	18450	12301/29516	139/29516	-324	-324	88.5
		SRX327756	MED1	14753	8870/29516	105/29516	-324	-324	84.48
		SRX327761	BRD4	5262	3106/29516	37/29516	-324	-324	83.95
		KDM5A ChIP-seq data was comprehensively compared with publicly available ChIP-seq data using ChIP-Atlas (https://chip-atlas.org/)
		Top 30 ranking in MM.1S cells is shown
