# Supplementary material for: Lysine Demethylase 5A Is Required for MYC-Driven Transcription in Multiple Myeloma
Source: Oxford University Press journal article supplement (doi:10.1158/2643-3230.bcd-20-0108), 2021-04-10
Supplement: 26433230bcd200108-sup-245460_2_supp_7002915_qqd5zf.xlsx [file 26433230bcd200108-sup-245460_2_supp_7002915_qqd5zf.xlsx]

## Sheet: Area - proteins
Supplementary Table S3. Potential KDM5A binding proteins identified by mass spectrometry
UniProtKB ID	Gene symbol	Protein	Empty 1	Empty 2	KDM5A 1	KDM5A 2	Empty	KDM5A	Log2 KDM5A/Empty
P29375	KDM5A	Lysine-specific demethylase 5A (EC 1.14.11.-) (Histone demethylase JARID1A) (Jumonji/ARID domain-containing protein 1A) (Retinoblastoma-binding protein 2) (RBBP-2)	5.84566e+06	6.2108e+06	1.37686e+09	4.85136e+07	1.20565e+07	1.42538e+09	6.88539
Q92610	ZN592	Zinc finger protein 592	4855.48	1172.27	131449	10661.7	6027.75	142111	4.55926
P28340	DPOD1	DNA polymerase delta catalytic subunit (EC 2.7.7.7) (EC 3.1.11.-) (DNA polymerase subunit delta p125)	2672.79	1790.28	84036.3	8217.26	4463.07	92253.6	4.3695
Q8WUU5	GATD1	GATA zinc finger domain-containing protein 1 (Ocular development-associated gene protein)	50517.4	51049.2	47339.9	1.55566e+06	101567	1.603e+06	3.98027
Q96QT6	PHF12	PHD finger protein 12 (PHD factor 1) (Pf1)	41220.8	28764.5	807246	25977.6	69985.3	833224	3.57358
Q7Z589	EMSY	BRCA2-interacting transcriptional repressor EMSY	12610.4	35915.2	561633	9882.21	48525.6	571515	3.55797
Q8IZH2	XRN1	5'-3' exoribonuclease 1 (EC 3.1.13.-) (Strand-exchange protein 1 homolog)	3373.88	675.987	43190.1	2908.63	4049.87	46098.8	3.50878
O75182	SIN3B	Paired amphipathic helix protein Sin3b (Histone deacetylase complex subunit Sin3b) (Transcriptional corepressor Sin3b)	30757.5	20399.2	509356	28377.1	51156.7	537733	3.39389
Q8IXB1	DJC10	DnaJ homolog subfamily C member 10 (EC 1.8.4.-) (Endoplasmic reticulum DNA J domain-containing protein 5) (ER-resident protein ERdj5) (ERdj5) (Macrothioredoxin) (MTHr)	299997	125717	3.72376e+06	208576	425714	3.93234e+06	3.20743
Q8NI77	KI18A	Kinesin-like protein KIF18A (Marrow stromal KIF18A) (MS-KIF18A)	1652.29	2779.79	35255.1	2339.92	4432.08	37595.1	3.08449
Q9UJA3	MCM8	DNA helicase MCM8 (EC 3.6.4.12) (Minichromosome maintenance 8)	2107.36	3413.34	39224.4	3715.48	5520.7	42939.9	2.95939
Q9ULU4	PKCB1	Protein kinase C-binding protein 1 (Cutaneous T-cell lymphoma-associated antigen se14-3) (CTCL-associated antigen se14-3) (Rack7) (Zinc finger MYND domain-containing protein 8)	136013	105395	1.60828e+06	51803.7	241409	1.66008e+06	2.78171
Q149N8	SHPRH	E3 ubiquitin-protein ligase SHPRH (EC 2.3.2.27) (EC 3.6.4.-) (RING-type E3 ubiquitin transferase SHPRH) (SNF2, histone-linker, PHD and RING finger domain-containing helicase)	3637.42	4262.98	51282.8	2780.15	7900.41	54063	2.77464
O60583	CCNT2	Cyclin-T2 (CycT2)	3808.46	3825.3	36880.6	14204.1	7633.75	51084.7	2.74243
Q8N1G0	ZN687	Zinc finger protein 687	169837	36431.4	1.34597e+06	31257.1	206269	1.37723e+06	2.73918
Q9H9A7	RMI1	RecQ-mediated genome instability protein 1 (BLM-associated protein of 75 kDa) (BLAP75) (FAAP75)	4761.3	1452.26	36618.5	4552.3	6213.55	41170.8	2.72813
O95793	STAU1	Double-stranded RNA-binding protein Staufen homolog 1	369047	1.8072e+06	848038	1.2326e+07	2.17625e+06	1.3174e+07	2.59778
Q6P1N0	C2D1A	Coiled-coil and C2 domain-containing protein 1A (Akt kinase-interacting protein 1) (Five prime repressor element under dual repression-binding protein 1) (FRE under dual repression-binding protein 1) (Freud-1) (Putative NF-kappa-B-activating protein 023N)	4804.04	3658.73	40822.7	9230.33	8462.77	50053.1	2.56426
Q9Y5Z7	HCFC2	Host cell factor 2 (HCF-2) (C2 factor)	15732.5	37600.6	269976	31580.9	53333.1	301556	2.49933
Q8IUF8	RIOX2	Ribosomal oxygenase 2 (60S ribosomal protein L27a histidine hydroxylase) (Bifunctional lysine-specific demethylase and histidyl-hydroxylase MINA) (EC 1.14.11.-) (Histone lysine demethylase MINA) (MYC-induced nuclear antigen) (Mineral dust-induced gene protein) (Nucleolar protein 52) (Ribosomal oxygenase MINA) (ROX)	3106.55	8319.57	13101.6	48044.7	11426.1	61146.2	2.41993
Q9UHB7	AFF4	AF4/FMR2 family member 4 (ALL1-fused gene from chromosome 5q31 protein) (Protein AF-5q31) (Major CDK9 elongation factor-associated protein)	53467.8	11289.7	334129	11504.6	64757.5	345633	2.41612
O15446	RPA34	DNA-directed RNA polymerase I subunit RPA34 (A34.5) (Antisense to ERCC-1 protein) (ASE-1) (CD3-epsilon-associated protein) (CAST) (CD3E-associated protein) (RNA polymerase I-associated factor PAF49)	2475.25	8588.3	51567	6885.9	11063.5	58452.9	2.40146
Q9HAN9	NMNA1	Nicotinamide/nicotinic acid mononucleotide adenylyltransferase 1 (NMN/NaMN adenylyltransferase 1) (EC 2.7.7.1) (EC 2.7.7.18) (Nicotinamide-nucleotide adenylyltransferase 1) (NMN adenylyltransferase 1) (Nicotinate-nucleotide adenylyltransferase 1) (NaMN adenylyltransferase 1)	34833.2	77755.2	15558.9	568508	112588	584067	2.37508
P51610	HCFC1	Host cell factor 1 (HCF) (HCF-1) (C1 factor) (CFF) (VCAF) (VP16 accessory protein) [Cleaved into: HCF N-terminal chain 1; HCF N-terminal chain 2; HCF N-terminal chain 3; HCF N-terminal chain 4; HCF N-terminal chain 5; HCF N-terminal chain 6; HCF C-terminal chain 1; HCF C-terminal chain 2; HCF C-terminal chain 3; HCF C-terminal chain 4; HCF C-terminal chain 5; HCF C-terminal chain 6]	290041	284510	2.68621e+06	248160	574550	2.93437e+06	2.35255
Q99996	AKAP9	A-kinase anchor protein 9 (AKAP-9) (A-kinase anchor protein 350 kDa) (AKAP 350) (hgAKAP 350) (A-kinase anchor protein 450 kDa) (AKAP 450) (AKAP 120-like protein) (Centrosome- and Golgi-localized PKN-associated protein) (CG-NAP) (Protein hyperion) (Protein kinase A-anchoring protein 9) (PRKA9) (Protein yotiao)	167210	68650.3	1.07743e+06	57039	235861	1.13446e+06	2.26601
O75607	NPM3	Nucleoplasmin-3	51145.9	248077	21042.1	1.34576e+06	299223	1.36681e+06	2.19152
P17612	KAPCA	cAMP-dependent protein kinase catalytic subunit alpha (PKA C-alpha) (EC 2.7.11.11)	4954.37	37738.3	3654.02	189600	42692.6	193254	2.17844
P05198	IF2A	Eukaryotic translation initiation factor 2 subunit 1 (Eukaryotic translation initiation factor 2 subunit alpha) (eIF-2-alpha) (eIF-2A) (eIF-2alpha)	18902	26403	20059.7	181894	45305	201954	2.15628
O95071	UBR5	E3 ubiquitin-protein ligase UBR5 (EC 2.3.2.26) (E3 ubiquitin-protein ligase, HECT domain-containing 1) (HECT-type E3 ubiquitin transferase UBR5) (Hyperplastic discs protein homolog) (hHYD) (Progestin-induced protein)	29317.4	9312.95	154149	13137.6	38630.3	167287	2.11452
Q8TEW0	PARD3	Partitioning defective 3 homolog (PAR-3) (PARD-3) (Atypical PKC isotype-specific-interacting protein) (ASIP) (CTCL tumor antigen se2-5) (PAR3-alpha)	268535	76614.6	1.411e+06	70154.5	345150	1.48115e+06	2.10142
Q9NRL2	BAZ1A	Bromodomain adjacent to zinc finger domain protein 1A (ATP-dependent chromatin-remodeling protein) (ATP-utilizing chromatin assembly and remodeling factor 1) (hACF1) (CHRAC subunit ACF1) (Williams syndrome transcription factor-related chromatin-remodeling factor 180) (WCRF180) (hWALp1)	2889.94	3541.1	25476.1	1337.21	6431.04	26813.3	2.05983
Q9P275	UBP36	Ubiquitin carboxyl-terminal hydrolase 36 (EC 3.4.19.12) (Deubiquitinating enzyme 36) (Ubiquitin thioesterase 36) (Ubiquitin-specific-processing protease 36)	26008.8	6008.54	124168	9082.1	32017.3	133250	2.05721
Q9NVV4	PAPD1	Poly(A) RNA polymerase, mitochondrial (PAP) (EC 2.7.7.19) (PAP-associated domain-containing protein 1) (Polynucleotide adenylyltransferase) (Terminal uridylyltransferase 1) (TUTase 1) (mtPAP)	3473.28	34910.4	16581.1	141826	38383.7	158407	2.04507
P32969	RL9	60S ribosomal protein L9 (Large ribosomal subunit protein uL6)	317012	2.09931e+06	184845	9.7568e+06	2.41632e+06	9.94164e+06	2.04067
Q9UEG4	ZN629	Zinc finger protein 629 (Zinc finger protein 65)	70006.3	54886.7	448774	62789.6	124893	511563	2.03422
Q92547	TOPB1	DNA topoisomerase 2-binding protein 1 (DNA topoisomerase II-beta-binding protein 1) (TopBP1) (DNA topoisomerase II-binding protein 1)	14552.4	14118.3	99188.3	11137.9	28670.6	110326	1.94413
Q8N5L8	RP25L	Ribonuclease P protein subunit p25-like protein (RNase P protein subunit-like p25) (Rpp25-like protein)	1378.11	46609.6	2237.77	176520	47987.7	178758	1.89727
O75817	POP7	Ribonuclease P protein subunit p20 (RNaseP protein p20) (EC 3.1.26.5) (Ribonucleases P/MRP protein subunit POP7 homolog) (hPOP7)	5893.24	42336.6	10152.9	169322	48229.8	179475	1.89579
O15294	OGT1	UDP-N-acetylglucosamine--peptide N-acetylglucosaminyltransferase 110 kDa subunit (EC 2.4.1.255) (O-GlcNAc transferase subunit p110) (O-linked N-acetylglucosamine transferase 110 kDa subunit) (OGT)	40779.2	17265.1	192508	21634.1	58044.2	214142	1.88334
Q9P270	SLAI2	SLAIN motif-containing protein 2	255404	98629.3	1.21161e+06	73942.2	354033	1.28555e+06	1.86043
Q9H089	LSG1	Large subunit GTPase 1 homolog (hLsg1) (EC 3.6.1.-)	89161.2	5018.97	126446	215255	94180.2	341701	1.85924
Q86Y91	KI18B	Kinesin-like protein KIF18B	9969.77	1339.42	38829	2079.33	11309.2	40908.4	1.8549
P05386	RLA1	60S acidic ribosomal protein P1 (Large ribosomal subunit protein P1)	93991.1	1.08389e+06	38901	4.20078e+06	1.17788e+06	4.23968e+06	1.84776
P50750	CDK9	Cyclin-dependent kinase 9 (EC 2.7.11.22) (EC 2.7.11.23) (C-2K) (Cell division cycle 2-like protein kinase 4) (Cell division protein kinase 9) (Serine/threonine-protein kinase PITALRE) (Tat-associated kinase complex catalytic subunit)	15156.9	40477.7	3374.84	185201	55634.6	188576	1.76109
P61313	RL15	60S ribosomal protein L15 (Large ribosomal subunit protein eL15)	117059	3.07319e+06	156988	1.05262e+07	3.19025e+06	1.06832e+07	1.7436
P49674	KC1E	Casein kinase I isoform epsilon (CKI-epsilon) (CKIe) (EC 2.7.11.1)	6192.52	9970.73	4823.39	49092.5	16163.2	53915.9	1.73799
Q5RKV6	EXOS6	Exosome complex component MTR3 (Exosome component 6) (mRNA transport regulator 3 homolog) (hMtr3) (p11)	8061.33	73317.4	28371.5	241826	81378.7	270197	1.73129
Q02878	RL6	60S ribosomal protein L6 (Large ribosomal subunit protein eL6) (Neoplasm-related protein C140) (Tax-responsive enhancer element-binding protein 107) (TaxREB107)	561833	9.53522e+06	1.30886e+06	3.12295e+07	1.00971e+07	3.25384e+07	1.68821
Q9Y450	HBS1L	HBS1-like protein (ERFS)	6508.13	3621.07	30688.4	1732.57	10129.2	32420.9	1.6784
P04844	RPN2	Dolichyl-diphosphooligosaccharide--protein glycosyltransferase subunit 2 (Dolichyl-diphosphooligosaccharide--protein glycosyltransferase 63 kDa subunit) (RIBIIR) (Ribophorin II) (RPN-II) (Ribophorin-2)	4100.98	5276.12	25088.6	4778.97	9377.1	29867.6	1.67137
Q07020	RL18	60S ribosomal protein L18 (Large ribosomal subunit protein eL18)	334752	7.61251e+06	687145	2.46178e+07	7.94726e+06	2.53049e+07	1.67089
Q12899	TRI26	Tripartite motif-containing protein 26 (EC 2.3.2.27) (Acid finger protein) (AFP) (RING finger protein 95) (Zinc finger protein 173)	192369	38543.4	684450	46404.7	230912	730855	1.66224
Q9HBE1	PATZ1	POZ-, AT hook-, and zinc finger-containing protein 1 (BTB/POZ domain zinc finger transcription factor) (Protein kinase A RI subunit alpha-associated protein) (Zinc finger and BTB domain-containing protein 19) (Zinc finger protein 278) (Zinc finger sarcoma gene protein)	6612.19	4652.33	27045.4	8292.81	11264.5	35338.2	1.64944
Q9NW13	RBM28	RNA-binding protein 28 (RNA-binding motif protein 28)	844957	52621	2.63016e+06	181252	897578	2.81142e+06	1.64719
Q9UBU8	MO4L1	Mortality factor 4-like protein 1 (MORF-related gene 15 protein) (Protein MSL3-1) (Transcription factor-like protein MRG15)	33720	58737.8	10537.9	278298	92457.8	288836	1.64338
Q8IY37	DHX37	Probable ATP-dependent RNA helicase DHX37 (EC 3.6.4.13) (DEAH box protein 37)	353056	140642	1.42726e+06	114847	493698	1.54211e+06	1.6432
Q9UKD2	MRT4	mRNA turnover protein 4 homolog (Ribosome assembly factor MRTO4)	34948.4	547268	29362.1	1.78628e+06	582217	1.81564e+06	1.64085
Q9Y3B7	RM11	39S ribosomal protein L11, mitochondrial (L11mt) (MRP-L11) (Mitochondrial large ribosomal subunit protein uL11m)	286033	1.09678e+06	57534.3	4.23035e+06	1.38281e+06	4.28788e+06	1.63266
Q02241	KIF23	Kinesin-like protein KIF23 (Kinesin-like protein 5) (Mitotic kinesin-like protein 1)	718793	142627	2.55598e+06	114603	861420	2.67059e+06	1.63237
Q96SN8	CK5P2	CDK5 regulatory subunit-associated protein 2 (CDK5 activator-binding protein C48) (Centrosome-associated protein 215)	74668	36889.8	311122	34009.8	111558	345132	1.62935
Q9NUQ6	SPS2L	SPATS2-like protein (DNA polymerase-transactivated protein 6) (Stress granule and nucleolar protein) (SGNP)	24474.9	43811.3	119875	90614.6	68286.3	210490	1.62409
Q02543	RL18A	60S ribosomal protein L18a (Large ribosomal subunit protein eL20)	330690	5.72214e+06	222429	1.81812e+07	6.05283e+06	1.84036e+07	1.60431
O00411	RPOM	DNA-directed RNA polymerase, mitochondrial (MtRPOL) (EC 2.7.7.6)	391716	78585.8	1.36546e+06	58693.2	470302	1.42416e+06	1.59845
Q8N8A6	DDX51	ATP-dependent RNA helicase DDX51 (EC 3.6.4.13) (DEAD box protein 51)	30068.6	20364.5	137062	15292.9	50433.1	152355	1.59499
P62910	RL32	60S ribosomal protein L32 (Large ribosomal subunit protein eL32)	120486	2.81625e+06	178910	8.69161e+06	2.93674e+06	8.87052e+06	1.5948
P36578	RL4	60S ribosomal protein L4 (60S ribosomal protein L1) (Large ribosomal subunit protein uL4)	1.01983e+06	1.57274e+07	2.00362e+06	4.85165e+07	1.67472e+07	5.05201e+07	1.59294
Q9Y3U8	RL36	60S ribosomal protein L36 (Large ribosomal subunit protein eL36)	102444	1.16556e+06	61139.3	3.74853e+06	1.268e+06	3.80967e+06	1.58711
Q9BRJ6	CG050	Uncharacterized protein C7orf50	22561.7	382249	23274.1	1.18356e+06	404811	1.20683e+06	1.57591
P61513	RL37A	60S ribosomal protein L37a (Large ribosomal subunit protein eL43)	29561.4	1.15648e+06	31889.4	3.49994e+06	1.18604e+06	3.53183e+06	1.57427
P46776	RL27A	60S ribosomal protein L27a (Large ribosomal subunit protein uL15)	106586	5.69556e+06	222067	1.69938e+07	5.80215e+06	1.72159e+07	1.56908
P06748	NPM	Nucleophosmin (NPM) (Nucleolar phosphoprotein B23) (Nucleolar protein NO38) (Numatrin)	358828	1.48017e+07	825194	4.41052e+07	1.51605e+07	4.49304e+07	1.56737
P46013	KI67	Proliferation marker protein Ki-67 (Antigen identified by monoclonal antibody Ki-67) (Antigen KI-67) (Antigen Ki67)	401621	169867	1.46735e+06	222155	571488	1.6895e+06	1.56381
Q9Y3A4	RRP7A	Ribosomal RNA-processing protein 7 homolog A (Gastric cancer antigen Zg14)	1137.49	25222.2	26440.9	51480	26359.7	77921	1.56368
Q14008	CKAP5	Cytoskeleton-associated protein 5 (Colonic and hepatic tumor overexpressed gene protein) (Ch-TOG)	357500	66403.1	1.17234e+06	74281.8	423903	1.24663e+06	1.55622
Q8WV44	TRI41	E3 ubiquitin-protein ligase TRIM41 (EC 2.3.2.27) (RING finger-interacting protein with C kinase) (RINCK) (RING-type E3 ubiquitin transferase TRIM41) (Tripartite motif-containing protein 41)	70951.3	124780	497206	74546.7	195732	571752	1.54651
P40429	RL13A	60S ribosomal protein L13a (23 kDa highly basic protein) (Large ribosomal subunit protein uL13)	192001	9.01564e+06	323174	2.65268e+07	9.20764e+06	2.685e+07	1.54402
Q6P161	RM54	39S ribosomal protein L54, mitochondrial (L54mt) (MRP-L54) (Mitochondrial large ribosomal subunit protein mL54)	17502.9	170005	13667.9	528070	187508	541738	1.53064
Q15369	ELOC	Elongin-C (EloC) (Elongin 15 kDa subunit) (RNA polymerase II transcription factor SIII subunit C) (SIII p15) (Transcription elongation factor B polypeptide 1)	3263.92	18531.8	18388.9	44307.5	21795.7	62696.3	1.52434
P05388	RLA0	60S acidic ribosomal protein P0 (60S ribosomal protein L10E) (Large ribosomal subunit protein uL10)	513822	1.31382e+07	528639	3.86067e+07	1.3652e+07	3.91354e+07	1.51936
Q8N3C0	ASCC3	Activating signal cointegrator 1 complex subunit 3 (EC 3.6.4.12) (ASC-1 complex subunit p200) (ASC1p200) (Helicase, ATP binding 1) (Trip4 complex subunit p200)	364911	81936.9	1.16098e+06	113895	446847	1.27487e+06	1.5125
Q9H7B2	RPF2	Ribosome production factor 2 homolog (Brix domain-containing protein 1) (Ribosome biogenesis protein RPF2 homolog)	22271.6	276104	42021.5	807487	298376	849508	1.5095
Q14241	ELOA1	Elongin-A (EloA) (Elongin 110 kDa subunit) (RNA polymerase II transcription factor SIII subunit A1) (SIII p110) (Transcription elongation factor B polypeptide 3)	180846	26114.8	548332	40708.9	206960	589040	1.50901
P83881	RL36A	60S ribosomal protein L36a (60S ribosomal protein L44) (Cell growth-inhibiting gene 15 protein) (Cell migration-inducing gene 6 protein) (Large ribosomal subunit protein eL42)	854.836	52314	1601.1	149079	53168.8	150681	1.50284
Q9H0H5	RGAP1	Rac GTPase-activating protein 1 (Male germ cell RacGap) (MgcRacGAP) (Protein CYK4 homolog) (CYK4) (HsCYK-4)	362589	66903.2	1.05515e+06	160017	429492	1.21517e+06	1.50045
P62888	RL30	60S ribosomal protein L30 (Large ribosomal subunit protein eL30)	511911	9.8493e+06	481779	2.88329e+07	1.03612e+07	2.93147e+07	1.50043
Q8TDN6	BRX1	Ribosome biogenesis protein BRX1 homolog (Brix domain-containing protein 2)	70857.6	999196	91867.9	2.93206e+06	1.07005e+06	3.02393e+06	1.49874
P30050	RL12	60S ribosomal protein L12 (Large ribosomal subunit protein uL11)	107834	7.22373e+06	79803	2.05523e+07	7.33157e+06	2.06321e+07	1.4927
O15235	RT12	28S ribosomal protein S12, mitochondrial (MRP-S12) (S12mt) (MT-RPS12) (Mitochondrial small ribosomal subunit protein uS12m)	2272.79	38983.2	4108.7	111966	41256	116075	1.49238
O15479	MAGB2	Melanoma-associated antigen B2 (Cancer/testis antigen 3.2) (CT3.2) (DSS-AHC critical interval MAGE superfamily 6) (DAM6) (MAGE XP-2 antigen) (MAGE-B2 antigen)	1670.83	17118.5	14388	38406.9	18789.3	52794.9	1.49049
P62424	RL7A	60S ribosomal protein L7a (Large ribosomal subunit protein eL8) (PLA-X polypeptide) (Surfeit locus protein 3)	497096	1.49401e+07	591250	4.27718e+07	1.54372e+07	4.3363e+07	1.49006
Q96TA2	YMEL1	ATP-dependent zinc metalloprotease YME1L1 (EC 3.4.24.-) (ATP-dependent metalloprotease FtsH1) (Meg-4) (Presenilin-associated metalloprotease) (PAMP) (YME1-like protein 1)	7094.04	9761.06	15059.9	32237.8	16855.1	47297.8	1.48859
P50914	RL14	60S ribosomal protein L14 (CAG-ISL 7) (Large ribosomal subunit protein eL14)	303568	1.08842e+07	332335	3.06191e+07	1.11878e+07	3.09514e+07	1.46808
P42696	RBM34	RNA-binding protein 34 (RNA-binding motif protein 34)	108416	440937	87037.6	1.42949e+06	549353	1.51653e+06	1.46497
Q14CB8	RHG19	Rho GTPase-activating protein 19 (Rho-type GTPase-activating protein 19)	3839.17	7572.72	4561.21	26835.1	11411.9	31396.3	1.46006
Q7L3T8	SYPM	Probable proline--tRNA ligase, mitochondrial (EC 6.1.1.15) (Prolyl-tRNA synthetase) (ProRS)	7084.43	56669.3	5988.91	169056	63753.7	175045	1.45714
P18077	RL35A	60S ribosomal protein L35a (Cell growth-inhibiting gene 33 protein) (Large ribosomal subunit protein eL33)	111190	3.40827e+06	70056.8	9.58448e+06	3.51946e+06	9.65453e+06	1.45585
P13861	KAP2	cAMP-dependent protein kinase type II-alpha regulatory subunit	155475	741894	133760	2.32557e+06	897370	2.45933e+06	1.45449
Q9Y5Q9	TF3C3	General transcription factor 3C polypeptide 3 (Transcription factor IIIC 102 kDa subunit) (TFIIIC 102 kDa subunit) (TFIIIC102) (Transcription factor IIIC subunit gamma) (TF3C-gamma)	32386	9995.38	81178.1	34653.2	42381.3	115831	1.45052
Q1ED39	KNOP1	Lysine-rich nucleolar protein 1 (Protein FAM191A) (Testis-specific gene 118 protein)	51130.6	107843	79771.5	354057	158973	433828	1.44834
Q9BV73	CP250	Centrosome-associated protein CEP250 (250 kDa centrosomal protein) (Cep250) (Centrosomal Nek2-associated protein 1) (C-Nap1) (Centrosomal protein 2)	97395.1	28863.1	306687	35408.7	126258	342096	1.43803
Q9BWF3	RBM4	RNA-binding protein 4 (Lark homolog) (hLark) (RNA-binding motif protein 4) (RNA-binding motif protein 4a)	15367.5	45699.5	17952.1	146928	61067	164880	1.43295
C9JAW5	C9JAW5	#N/A	4446.62	10627.3	11117.2	29553.1	15073.9	40670.3	1.43193
Q9UII4	HERC5	E3 ISG15--protein ligase HERC5 (EC 2.3.2.-) (Cyclin-E-binding protein 1) (HECT domain and RCC1-like domain-containing protein 5)	186719	27907.5	454803	118110	214626	572913	1.41649
Q9H6R0	DHX33	ATP-dependent RNA helicase DHX33 (EC 3.6.4.13) (DEAH box protein 33)	89930.5	39812	307955	37904.2	129742	345859	1.41453
Q9BQ67	GRWD1	Glutamate-rich WD repeat-containing protein 1	101437	740154	112095	2.12992e+06	841591	2.24202e+06	1.41361
P54132	BLM	Bloom syndrome protein (EC 3.6.4.12) (DNA helicase, RecQ-like type 2) (RecQ2) (RecQ protein-like 3)	488893	86219.3	1.33424e+06	194347	575113	1.52858e+06	1.41028
Q12797	ASPH	Aspartyl/asparaginyl beta-hydroxylase (EC 1.14.11.16) (Aspartate beta-hydroxylase) (ASP beta-hydroxylase) (Peptide-aspartate beta-dioxygenase)	21053.6	1209.43	52607.5	6055.89	22263	58663.4	1.39781
P48643	TCPE	T-complex protein 1 subunit epsilon (TCP-1-epsilon) (CCT-epsilon)	7971.8	18140.1	29366.2	39137.5	26111.9	68503.7	1.39147
P46779	RL28	60S ribosomal protein L28 (Large ribosomal subunit protein eL28)	117775	5.17994e+06	159603	1.37289e+07	5.29772e+06	1.38885e+07	1.39045
Q7LGA3	HS2ST	Heparan sulfate 2-O-sulfotransferase 1 (2-O-sulfotransferase) (2OST) (EC 2.8.2.-)	22146.9	41387.6	27040.7	136964	63534.5	164004	1.36812
P46778	RL21	60S ribosomal protein L21 (Large ribosomal subunit protein eL21)	249220	4.3394e+06	209543	1.1606e+07	4.58862e+06	1.18155e+07	1.36455
Q9UPP1	PHF8	Histone lysine demethylase PHF8 (EC 1.14.11.27) (PHD finger protein 8)	367639	45786.4	1.00554e+06	49608.3	413425	1.05514e+06	1.35174
P26373	RL13	60S ribosomal protein L13 (Breast basic conserved protein 1) (Large ribosomal subunit protein eL13)	211725	8.65898e+06	211231	2.23989e+07	8.87071e+06	2.26101e+07	1.34985
P62906	RL10A	60S ribosomal protein L10a (CSA-19) (Large ribosomal subunit protein uL1) (Neural precursor cell expressed developmentally down-regulated protein 6) (NEDD-6)	176491	9.11819e+06	162439	2.35076e+07	9.29468e+06	2.36701e+07	1.34859
Q15050	RRS1	Ribosome biogenesis regulatory protein homolog	61402.5	216003	160871	536170	277406	697040	1.32925
P47914	RL29	60S ribosomal protein L29 (Cell surface heparin-binding protein HIP) (Large ribosomal subunit protein eL29)	50391.2	1.22053e+06	44055.7	3.13487e+06	1.27092e+06	3.17892e+06	1.32267
P83111	LACTB	Serine beta-lactamase-like protein LACTB, mitochondrial (EC 3.4.-.-)	1596.3	7532.47	3093.38	19641.5	9128.76	22734.9	1.31642
P61353	RL27	60S ribosomal protein L27 (Large ribosomal subunit protein eL27)	144673	9.18067e+06	85422.4	2.29126e+07	9.32534e+06	2.29981e+07	1.30228
Q9H501	ESF1	ESF1 homolog (ABT1-associated protein)	43805.5	6598.35	115389	8646.75	50403.8	124036	1.29915
P18124	RL7	60S ribosomal protein L7 (Large ribosomal subunit protein uL30)	475696	1.2769e+07	313882	3.22185e+07	1.32447e+07	3.25324e+07	1.29647
O60825	F262	6-phosphofructo-2-kinase/fructose-2,6-bisphosphatase 2 (6PF-2-K/Fru-2,6-P2ase 2) (PFK/FBPase 2) (6PF-2-K/Fru-2,6-P2ase heart-type isozyme) [Includes: 6-phosphofructo-2-kinase (EC 2.7.1.105); Fructose-2,6-bisphosphatase (EC 3.1.3.46)]	15308.6	44049.4	18905.1	126460	59358	145365	1.29217
P19338	NUCL	Nucleolin (Protein C23)	1.47528e+07	1.99368e+06	3.72466e+07	3.12935e+06	1.67465e+07	4.03759e+07	1.26963
P05387	RLA2	60S acidic ribosomal protein P2 (Large ribosomal subunit protein P2) (Renal carcinoma antigen NY-REN-44)	104574	3.0903e+06	78132.3	7.56479e+06	3.19488e+06	7.64292e+06	1.25836
P61964	WDR5	WD repeat-containing protein 5 (BMP2-induced 3-kb gene protein)	17697.8	121302	29898.2	302266	138999	332164	1.25682
Q9NRX1	PNO1	RNA-binding protein PNO1	1574.81	42628.2	12543.8	93018.2	44203	105562	1.25587
Q99848	EBP2	Probable rRNA-processing protein EBP2 (EBNA1-binding protein 2) (Nucleolar protein p40)	52702.4	512321	41658.1	1.30728e+06	565024	1.34893e+06	1.25544
P62917	RL8	60S ribosomal protein L8 (Large ribosomal subunit protein uL2)	546076	1.20822e+07	334464	2.97075e+07	1.26282e+07	3.0042e+07	1.25033
Q8N0Z8	PUSL1	tRNA pseudouridine synthase-like 1 (EC 5.4.99.-) (tRNA pseudouridylate synthase-like 1) (tRNA-uridine isomerase-like 1)	2022.74	30576.1	7991.19	68911.5	32598.8	76902.7	1.23822
Q9P0L2	MARK1	Serine/threonine-protein kinase MARK1 (EC 2.7.11.1) (EC 2.7.11.26) (MAP/microtubule affinity-regulating kinase 1) (PAR1 homolog c) (Par-1c) (Par1c)	36945.1	8209.92	70411.6	36075.7	45155	106487	1.23772
Q9H2H8	PPIL3	Peptidyl-prolyl cis-trans isomerase-like 3 (PPIase) (EC 5.2.1.8) (Cyclophilin J) (CyPJ) (Cyclophilin-like protein PPIL3) (Rotamase PPIL3)	47772.1	172091	13673.8	504493	219863	518167	1.23681
P62913	RL11	60S ribosomal protein L11 (CLL-associated antigen KW-12) (Large ribosomal subunit protein uL5)	241021	7.10283e+06	197244	1.70179e+07	7.34385e+06	1.72151e+07	1.22907
Q9H0S4	DDX47	Probable ATP-dependent RNA helicase DDX47 (EC 3.6.4.13) (DEAD box protein 47)	26951.4	113180	11386.7	315663	140131	327050	1.22273
Q8NFW8	NEUA	N-acylneuraminate cytidylyltransferase (EC 2.7.7.43) (CMP-N-acetylneuraminic acid synthase) (CMP-NeuNAc synthase)	68651.1	198916	55486.9	567265	267567	622752	1.21876
Q9Y221	NIP7	60S ribosome subunit biogenesis protein NIP7 homolog (KD93)	64841.2	520475	25365	1.33556e+06	585316	1.36092e+06	1.2173
Q16875	F263	6-phosphofructo-2-kinase/fructose-2,6-bisphosphatase 3 (6PF-2-K/Fru-2,6-P2ase 3) (PFK/FBPase 3) (6PF-2-K/Fru-2,6-P2ase brain/placenta-type isozyme) (Renal carcinoma antigen NY-REN-56) (iPFK-2) [Includes: 6-phosphofructo-2-kinase (EC 2.7.1.105); Fructose-2,6-bisphosphatase (EC 3.1.3.46)]	30587.5	102827	25906.9	283262	133414	309169	1.21248
O60841	IF2P	Eukaryotic translation initiation factor 5B (eIF-5B) (EC 3.6.5.3) (Translation initiation factor IF-2)	65483.2	18107.5	159627	32793.8	83590.7	192420	1.20285
O95391	SLU7	Pre-mRNA-splicing factor SLU7 (hSlu7)	157984	50201.9	395183	81863.4	208186	477047	1.19626
P78346	RPP30	Ribonuclease P protein subunit p30 (RNaseP protein p30) (EC 3.1.26.5) (RNase P subunit 2)	42327.4	184091	24138.2	494280	226419	518418	1.19512
P49207	RL34	60S ribosomal protein L34 (Large ribosomal subunit protein eL34)	7156.07	185245	8965.1	431336	192401	440301	1.19437
O96028	NSD2	Histone-lysine N-methyltransferase NSD2 (EC 2.1.1.43) (Multiple myeloma SET domain-containing protein) (MMSET) (Nuclear SET domain-containing protein 2) (Protein trithorax-5) (Wolf-Hirschhorn syndrome candidate 1 protein)	59544.7	16412	143084	30538.2	75956.6	173622	1.1927
Q3B820	F161A	Protein FAM161A	71529.7	13301.3	173050	20360.4	84830.9	193410	1.189
P35251	RFC1	Replication factor C subunit 1 (Activator 1 140 kDa subunit) (A1 140 kDa subunit) (Activator 1 large subunit) (Activator 1 subunit 1) (DNA-binding protein PO-GA) (Replication factor C 140 kDa subunit) (RF-C 140 kDa subunit) (RFC140) (Replication factor C large subunit)	590462	87436	1.46938e+06	75529.7	677898	1.54491e+06	1.18838
Q9P2D0	IBTK	Inhibitor of Bruton tyrosine kinase (IBtk)	115758	1.65203e+06	150278	3.8711e+06	1.76779e+06	4.02138e+06	1.18575
Q96ME7	ZN512	Zinc finger protein 512	34678.7	29975.6	77776.1	68865.8	64654.4	146642	1.18148
P27635	RL10	60S ribosomal protein L10 (Laminin receptor homolog) (Large ribosomal subunit protein uL16) (Protein QM) (Ribosomal protein L10) (Tumor suppressor QM)	248050	8.29936e+06	377040	1.89121e+07	8.54741e+06	1.92891e+07	1.17423
P40937	RFC5	Replication factor C subunit 5 (Activator 1 36 kDa subunit) (A1 36 kDa subunit) (Activator 1 subunit 5) (Replication factor C 36 kDa subunit) (RF-C 36 kDa subunit) (RFC36)	19765	218327	16359.2	520849	238092	537208	1.17396
Q71DI3	H32	Histone H3.2 (Histone H3/m) (Histone H3/o)	19197.8	102183	17857.5	255938	121381	273796	1.17356
P37108	SRP14	Signal recognition particle 14 kDa protein (SRP14) (18 kDa Alu RNA-binding protein)	73648	1.17367e+06	57666.3	2.74818e+06	1.24732e+06	2.80584e+06	1.1696
P62753	RS6	40S ribosomal protein S6 (Phosphoprotein NP33) (Small ribosomal subunit protein eS6)	261966	8.27727e+06	253704	1.88723e+07	8.53924e+06	1.9126e+07	1.16336
Q9H8H2	DDX31	Probable ATP-dependent RNA helicase DDX31 (EC 3.6.4.13) (DEAD box protein 31) (Helicain)	374759	113436	923440	167779	488195	1.09122e+06	1.16041
Q7Z2T5	TRM1L	TRMT1-like protein (EC 2.1.1.-)	350480	104712	953641	63595.5	455192	1.01724e+06	1.16011
Q5T280	CI114	Putative methyltransferase C9orf114 (EC 2.1.1.-) (Centromere protein 32) (CENP-32) (Kinetochore-associated protein) (SPOUT domain-containing methyltransferase 1)	19123.8	69599.2	82498.9	115243	88723	197742	1.15624
Q9Y2R4	DDX52	Probable ATP-dependent RNA helicase DDX52 (EC 3.6.4.13) (ATP-dependent RNA helicase ROK1-like) (DEAD box protein 52)	579372	73789.1	1.22125e+06	234138	653161	1.45539e+06	1.1559
P62847	RS24	40S ribosomal protein S24 (Small ribosomal subunit protein eS24)	235551	4.90294e+06	136758	1.1251e+07	5.13849e+06	1.13877e+07	1.14806
Q9H8V3	ECT2	Protein ECT2 (Epithelial cell-transforming sequence 2 oncogene)	47898.1	5942.06	114224	4676.15	53840.2	118900	1.14299
Q9BY12	SCAPE	S phase cyclin A-associated protein in the endoplasmic reticulum (S phase cyclin A-associated protein in the ER) (Zinc finger protein 291)	19217.7	2588.39	42133.8	5833.96	21806.1	47967.7	1.13733
P46777	RL5	60S ribosomal protein L5 (Large ribosomal subunit protein uL18)	78955	906059	85542.9	2.0801e+06	985014	2.16565e+06	1.13658
Q8TDD1	DDX54	ATP-dependent RNA helicase DDX54 (EC 3.6.4.13) (ATP-dependent RNA helicase DP97) (DEAD box RNA helicase 97 kDa) (DEAD box protein 54)	1.3288e+06	169333	3.09099e+06	199131	1.49813e+06	3.29012e+06	1.13498
Q9Y3C1	NOP16	Nucleolar protein 16 (HBV pre-S2 trans-regulated protein 3)	15624	48293.1	15519.4	124453	63917.1	139973	1.13087
Q9BXS6	NUSAP	Nucleolar and spindle-associated protein 1 (NuSAP)	766.598	12146.4	719.678	27549.3	12913	28269	1.1304
Q99615	DNJC7	DnaJ homolog subfamily C member 7 (Tetratricopeptide repeat protein 2) (TPR repeat protein 2)	64057.8	103536	246140	120446	167594	366586	1.12918
Q9Y3B2	EXOS1	Exosome complex component CSL4 (Exosome component 1)	3254.7	32191.5	1030.54	76382.3	35446.2	77412.9	1.12694
P35249	RFC4	Replication factor C subunit 4 (Activator 1 37 kDa subunit) (A1 37 kDa subunit) (Activator 1 subunit 4) (Replication factor C 37 kDa subunit) (RF-C 37 kDa subunit) (RFC37)	70856	364710	41510.1	904463	435566	945973	1.11891
O95819	M4K4	Mitogen-activated protein kinase kinase kinase kinase 4 (EC 2.7.11.1) (HPK/GCK-like kinase HGK) (MAPK/ERK kinase kinase kinase 4) (MEK kinase kinase 4) (MEKKK 4) (Nck-interacting kinase)	51680.5	12630.4	127199	12083.8	64310.9	139282	1.11488
Q9UFW8	CGBP1	CGG triplet repeat-binding protein 1 (CGG-binding protein 1) (20 kDa CGG-binding protein) (p20-CGGBP DNA-binding protein)	26659.1	120685	23860.1	294841	147344	318701	1.11301
Q14146	URB2	Unhealthy ribosome biogenesis protein 2 homolog	17280.1	8829	49978.5	6154.06	26109.1	56132.6	1.10429
Q9Y2P8	RCL1	RNA 3'-terminal phosphate cyclase-like protein	19717	90533	7964.29	228626	110250	236590	1.10161
Q3ZCQ8	TIM50	Mitochondrial import inner membrane translocase subunit TIM50	1092.25	27970.6	1500.83	60767	29062.9	62267.8	1.09931
Q8IWS0	PHF6	PHD finger protein 6 (PHD-like zinc finger protein)	38153.7	683394	55706	1.48883e+06	721548	1.54454e+06	1.09801
Q969H6	POP5	Ribonuclease P/MRP protein subunit POP5 (hPop5) (EC 3.1.26.5)	3190.43	13790.1	7062.99	29279.6	16980.6	36342.6	1.09778
P62701	RS4X	40S ribosomal protein S4, X isoform (SCR10) (Single copy abundant mRNA protein) (Small ribosomal subunit protein eS4)	559860	2.60354e+07	694078	5.61851e+07	2.65953e+07	5.68792e+07	1.09673
Q9H7E9	CH033	UPF0488 protein C8orf33	8310.28	284820	16369.8	610258	293130	626628	1.09607
Q92769	HDAC2	Histone deacetylase 2 (HD2) (EC 3.5.1.98)	17052.9	36997.9	45265.6	70278	54050.8	115544	1.09605
Q9H1I8	ASCC2	Activating signal cointegrator 1 complex subunit 2 (ASC-1 complex subunit p100) (Trip4 complex subunit p100)	127819	84167.1	292585	160060	211986	452644	1.09441
Q9GZN1	ARP6	Actin-related protein 6 (hArp6) (hARPX)	18622.6	83142.2	29681.7	186887	101765	216569	1.08959
P35268	RL22	60S ribosomal protein L22 (EBER-associated protein) (EAP) (Epstein-Barr virus small RNA-associated protein) (Heparin-binding protein HBp15) (Large ribosomal subunit protein eL22)	52195.1	2.95674e+06	41735.1	6.35363e+06	3.00893e+06	6.39537e+06	1.08778
P62241	RS8	40S ribosomal protein S8 (Small ribosomal subunit protein eS8)	358099	1.29667e+07	314890	2.78607e+07	1.33248e+07	2.81756e+07	1.08033
Q9UQE7	SMC3	Structural maintenance of chromosomes protein 3 (SMC protein 3) (SMC-3) (Basement membrane-associated chondroitin proteoglycan) (Bamacan) (Chondroitin sulfate proteoglycan 6) (Chromosome-associated polypeptide) (hCAP)	39812	8525.02	91832.4	10044.6	48337.1	101877	1.07563
Q8WXX5	DNJC9	DnaJ homolog subfamily C member 9 (HDJC9) (DnaJ protein SB73)	96159.8	711488	107042	1.5905e+06	807648	1.69754e+06	1.07165
Q8N5C6	SRBD1	S1 RNA-binding domain-containing protein 1	220218	41663.6	512377	35462.3	261882	547840	1.06484
Q5TZA2	CROCC	Rootletin (Ciliary rootlet coiled-coil protein)	78434.1	32773.4	187833	43595.5	111208	231428	1.05731
P62266	RS23	40S ribosomal protein S23 (Small ribosomal subunit protein uS12)	149489	7.34981e+06	130404	1.53996e+07	7.4993e+06	1.553e+07	1.05023
Q8WTT2	NOC3L	Nucleolar complex protein 3 homolog (NOC3 protein homolog) (Factor for adipocyte differentiation 24) (NOC3-like protein) (Nucleolar complex-associated protein 3-like protein)	110185	7348.95	222357	20175.1	117534	242532	1.0451
P27448	MARK3	MAP/microtubule affinity-regulating kinase 3 (EC 2.7.11.1) (C-TAK1) (cTAK1) (Cdc25C-associated protein kinase 1) (ELKL motif kinase 2) (EMK-2) (Protein kinase STK10) (Ser/Thr protein kinase PAR-1) (Par-1a) (Serine/threonine-protein kinase p78)	143473	33096.7	309947	53862.6	176569	363809	1.04295
P83731	RL24	60S ribosomal protein L24 (60S ribosomal protein L30) (Large ribosomal subunit protein eL24)	183068	7.58792e+06	96395.4	1.58919e+07	7.77099e+06	1.59883e+07	1.04085
P62280	RS11	40S ribosomal protein S11 (Small ribosomal subunit protein uS17)	178652	1.41208e+07	316838	2.90041e+07	1.42995e+07	2.9321e+07	1.03597
P49458	SRP09	Signal recognition particle 9 kDa protein (SRP9)	14585.8	329101	3391.48	700717	343687	704108	1.0347
Q9NV31	IMP3	U3 small nucleolar ribonucleoprotein protein IMP3 (U3 snoRNP protein IMP3) (BRMS2)	3338.18	117277	933.529	245842	120616	246776	1.03278
Q8IX18	DHX40	Probable ATP-dependent RNA helicase DHX40 (EC 3.6.4.13) (DEAH box protein 40) (Protein PAD)	37068	3947.46	65740.8	18139.4	41015.4	83880.2	1.03216
P62081	RS7	40S ribosomal protein S7 (Small ribosomal subunit protein eS7)	275074	7.18328e+06	126876	1.50586e+07	7.45835e+06	1.51855e+07	1.02577
P53350	PLK1	Serine/threonine-protein kinase PLK1 (EC 2.7.11.21) (Polo-like kinase 1) (PLK-1) (Serine/threonine-protein kinase 13) (STPK13)	80622.9	15505.4	123096	72584.7	96128.3	195681	1.02547
Q7KZI7	MARK2	Serine/threonine-protein kinase MARK2 (EC 2.7.11.1) (EC 2.7.11.26) (ELKL motif kinase 1) (EMK-1) (MAP/microtubule affinity-regulating kinase 2) (PAR1 homolog) (PAR1 homolog b) (Par-1b) (Par1b)	204259	33727.9	425536	57816.1	237987	483353	1.02219
Q8IWC1	MA7D3	MAP7 domain-containing protein 3	282897	65209.1	651025	52330.8	348106	703356	1.01473
P40938	RFC3	Replication factor C subunit 3 (Activator 1 38 kDa subunit) (A1 38 kDa subunit) (Activator 1 subunit 3) (Replication factor C 38 kDa subunit) (RF-C 38 kDa subunit) (RFC38)	16971.3	158528	12039.2	342300	175499	354339	1.01367
Q6DKI1	RL7L	60S ribosomal protein L7-like 1 (Large ribosomal subunit protein uL30-like 1)	26795.8	100396	5881	250246	127192	256127	1.00985
Q96CB9	NSUN4	5-methylcytosine rRNA methyltransferase NSUN4 (EC 2.1.1.-) (NOL1/NOP2/Sun domain family member 4)	3501.65	31541.3	2854.74	67577.2	35043	70432	1.0071
Q9P2E9	RRBP1	Ribosome-binding protein 1 (180 kDa ribosome receptor homolog) (RRp) (ES/130-related protein) (Ribosome receptor protein)	904727	79190.9	1.89819e+06	77611.4	983918	1.9758e+06	1.00583
P16402	H13	Histone H1.3 (Histone H1c) (Histone H1s-2)	9953.26	291773	721.784	604503	301727	605225	1.00423
P84243	H33	Histone H3.3	3890.81	35431.7	2376.63	76447.9	39322.5	78824.6	1.00329
P46087	NOP2	Probable 28S rRNA (cytosine(4447)-C(5))-methyltransferase (EC 2.1.1.-) (Nucleolar protein 1) (Nucleolar protein 2 homolog) (Proliferating-cell nucleolar antigen p120) (Proliferation-associated nucleolar protein p120)	1.70053e+06	282385	3.7773e+06	193579	1.98292e+06	3.97088e+06	1.00183
P68431	H31	Histone H3.1 (Histone H3/a) (Histone H3/b) (Histone H3/c) (Histone H3/d) (Histone H3/f) (Histone H3/h) (Histone H3/i) (Histone H3/j) (Histone H3/k) (Histone H3/l)	12351.1	10842.4	1339.27	45099.1	23193.5	46438.4	1.0016
Q9NZM5	NOP53	Ribosome biogenesis protein NOP53 (Glioma tumor suppressor candidate region gene 2 protein) (Protein interacting with carboxyl terminus 1) (PICT-1) (p60)	45136.7	149884	51826.9	337645	195020	389472	0.997896
